# Supplementary material for: Photophysics of 1,8-naphthalimide/Ln(iii) dyads (Ln = Eu, Gd): naphthalimide → Eu(iii) energy-transfer from both singlet and triplet states
Source: Royal Society of Chemistry journal article supplement (doi:10.1039/c3pp50109d), 2013-05-31
Supplement: c3pp50109d.pdf [file c3pp50109d.pdf]

**Photophysics of 1,8-naphthalimide / Ln(III) dyads (Ln = Eu, Gd):  
naphthalimide → Eu(III) energy-transfer from both singlet and triplet  
states.**

Victor F. Plyusnin,<sup>a,\*</sup> Arkady S. Kupryakov,<sup>a</sup> Vyacheslav P. Grivin,<sup>a</sup>  
Alexander H. Shelton,<sup>b</sup> Igor V. Sazanovich,<sup>b</sup> Anthony J. H. M. Meijer,<sup>b</sup>  
Julia A. Weinstein<sup>b</sup> and Michael D. Ward<sup>b,\*</sup>

Electronic supporting information

Figures S1 – S7: Additional figures (absorption spectra, luminescence spectra, kinetic traces, triplet-triplet absorption spectra) for the three compounds.

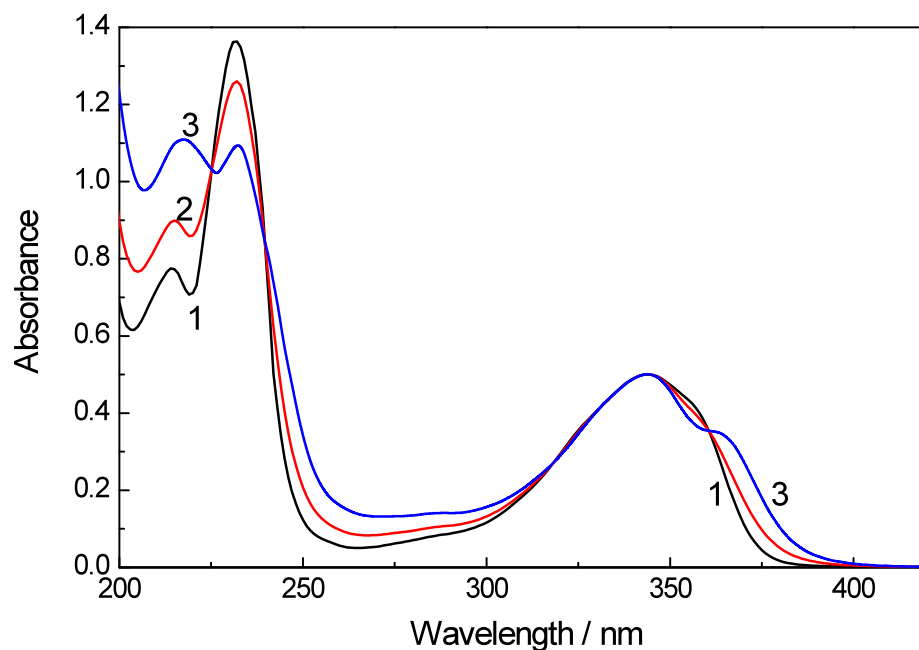

**Fig. S1.** UV/Vis absorption spectra of Gd•L in water: (1) concentration  $4.27 \times 10^{-5}$  M (path length 1 cm); and (2) concentration  $0.79 \times 10^{-2}$  M (path length 54  $\mu\text{m}$ ). The calculated spectrum of a dimer is presented as curve (3).

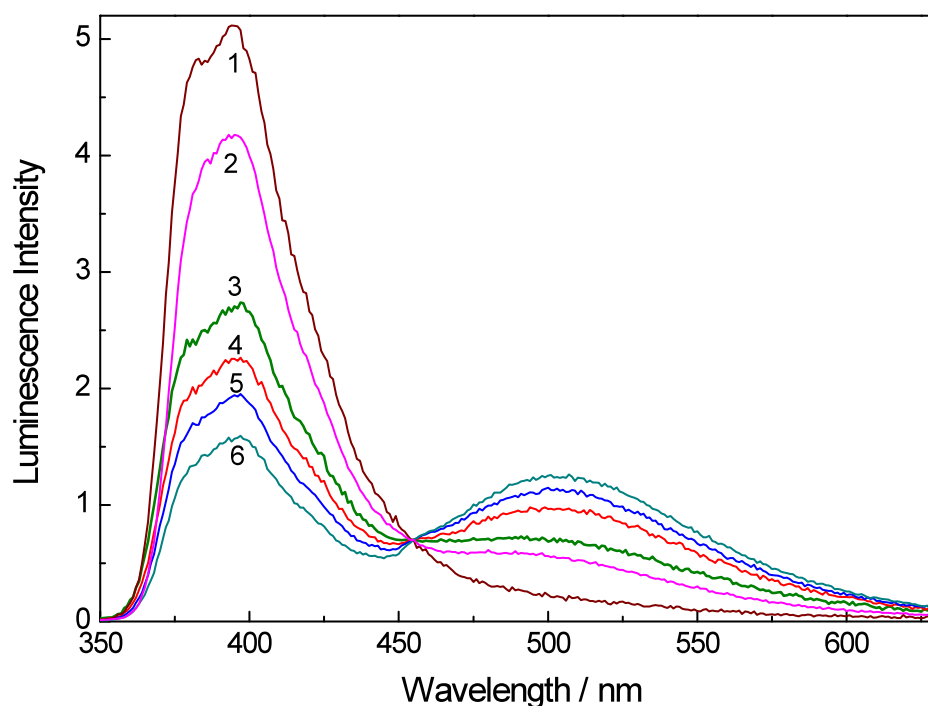

**Fig. S2.** Luminescence spectra of Gd•L in water with excitation a 320 nm. Spectra (1) – (6) were recorded at concentrations  $1.14 \times 10^{-4}$ ,  $1.37 \times 10^{-3}$ ,  $2.04 \times 10^{-3}$ ,  $4.52 \times 10^{-3}$ ,  $7.43 \times 10^{-3}$  and  $1.02 \times 10^{-2}$  M, respectively. Spectra (1) and (2) were recorded using 1 and 0.1 cm cuvettes; spectra (3) – (6) were recorded using a 54  $\mu\text{m}$  cuvette. Normalization of spectra recorded with different path lengths was made with the help of the isosbestic point.

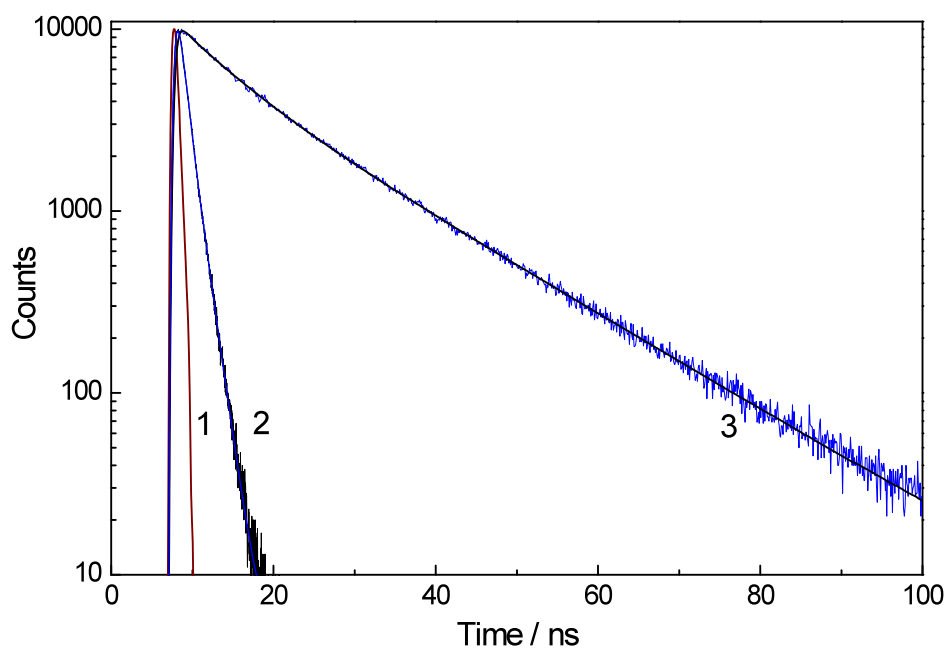

**Fig. S3.** Luminescence decay kinetics of Eu•L in water with excitation at 320 nm. Curve (1): instrument response function. Curves (2) and (3): decay kinetics at 395 and 505 nm, respectively (Eu•L concentration,  $1.75 \times 10^{-2}$  M; 54  $\mu\text{m}$  cuvette). Solid lines on the kinetic traces are the calculated fits using a three exponential approximation (parameters in Table 1).

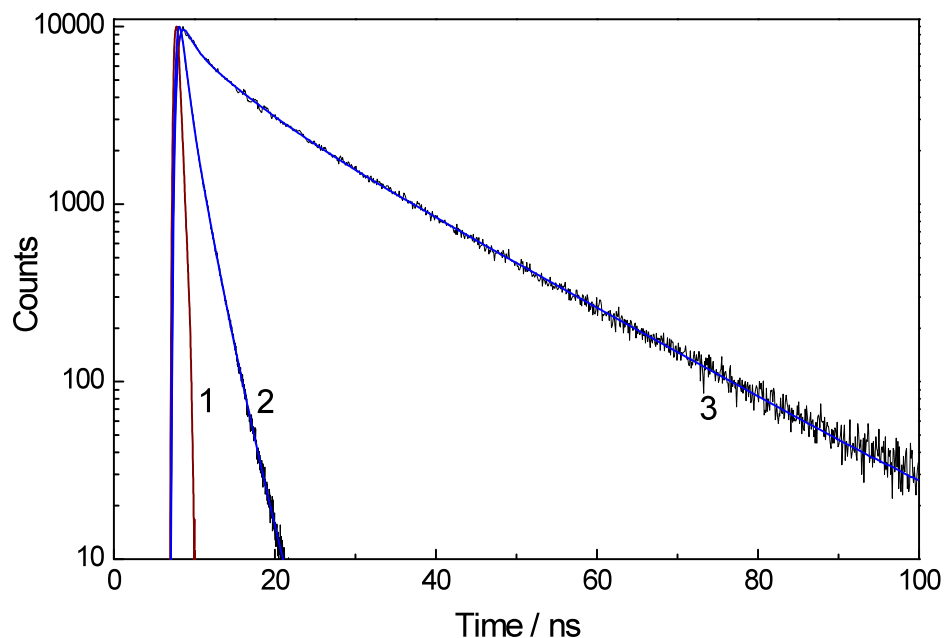

**Fig. S4.** Luminescence decay kinetics of Gd•L in water with excitation at 320 nm. Curve (1): instrument response function. Curve (2): decay kinetics at 393 nm at low Gd•L concentration ( $1.13 \times 10^{-4}$  M, 1 cm cuvette). Curve (3): decay kinetics at 500 nm at high Gd•L concentration ( $7.9 \times 10^{-3}$  M, 54  $\mu\text{m}$  cuvette). Solid lines on the kinetic traces are the calculated fits using a three exponential approximation (parameters in Table 1).

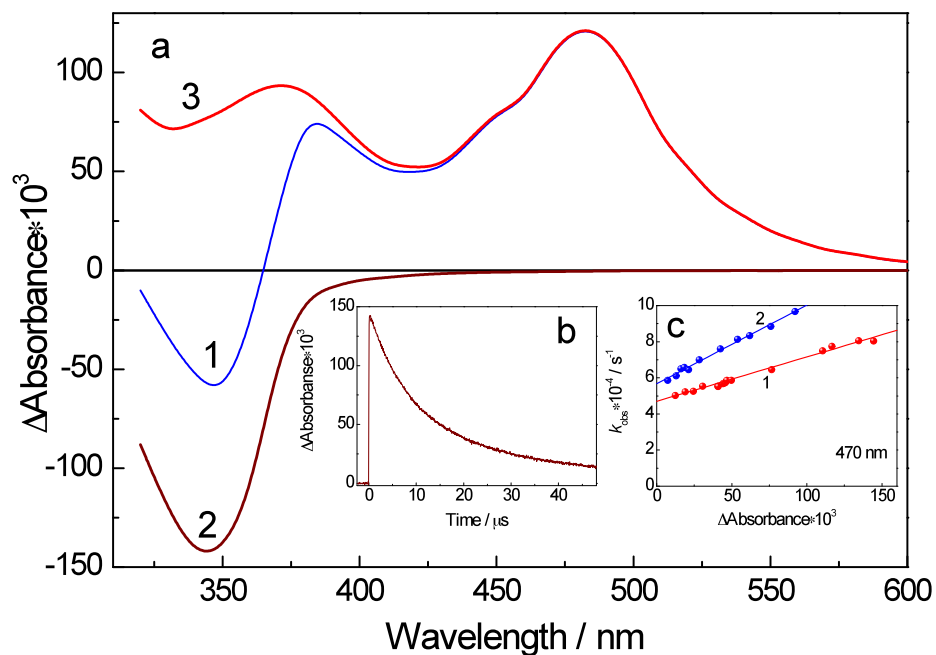

**Fig. S5.** The triplet-triplet absorption spectrum (a) and its decay (b) of Gd•L in deoxygenated water after laser excitation at 355 nm. Panel (c) shows the dependence of  $k_{\text{obs}}$  for the T-T absorption decay at 470 nm on the value of the initial absorption ( $\Delta A$ ), for both Gd•L (line 1) and Eu•L (line 2). In frame (a): (1), the measured differential T-T absorption; (2), the UV/Vis spectrum of the complex showing the naphthalimide absorption; (3), the difference between (1) and (2), *i.e.* the T-T absorption spectrum.

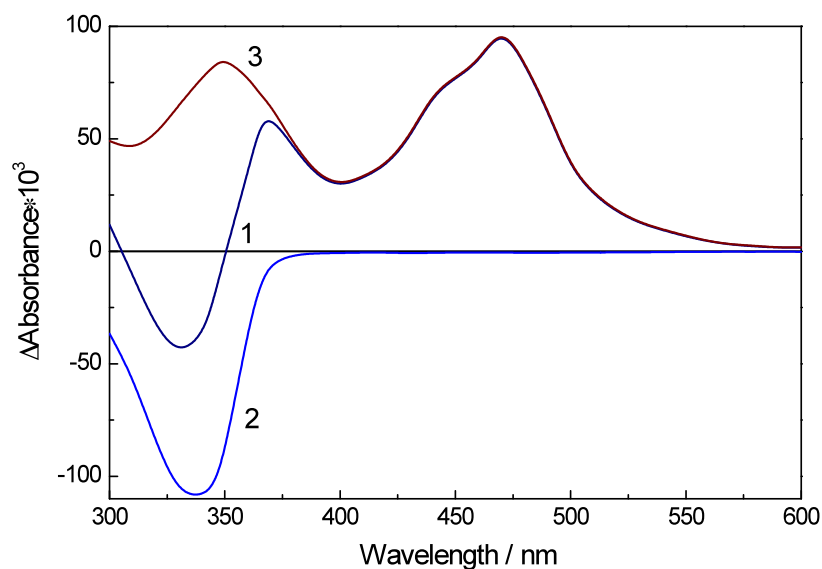

**Fig. S6.** The triplet-triplet absorption spectrum of Eu•L in deoxygenated  $\text{CH}_3\text{CN}$  after laser excitation at 355 nm. Curve (1) is the measured differential T-T absorption; curve (2) is the UV/Vis spectrum of the complex showing the naphthalimide absorption; curve (3) is the difference between (1) and (2), *i.e.* the T-T absorption spectrum.

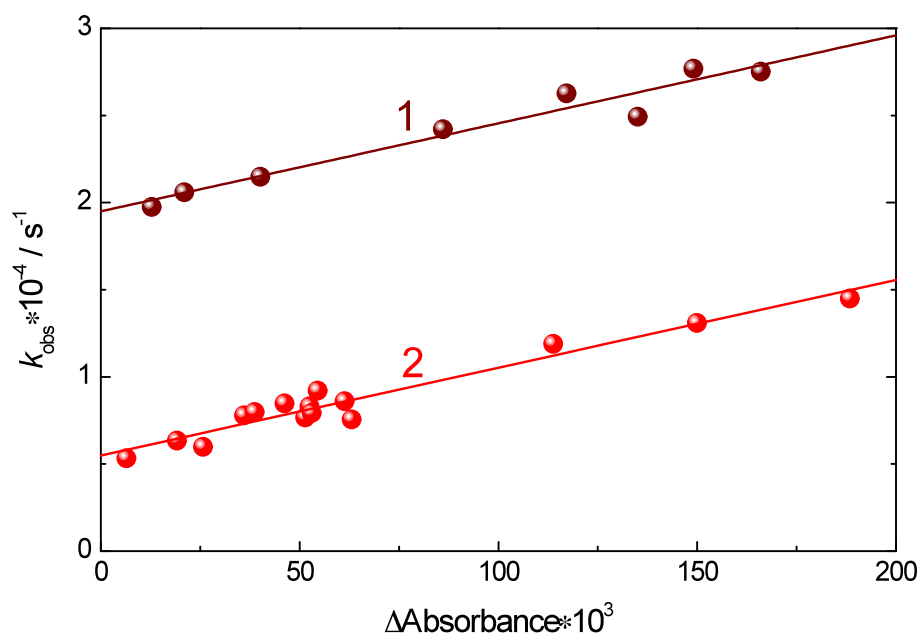

**Fig. S7.** Dependence of  $k_{\text{obs}}$  for the T-T absorption decay at 470 nm on the value of initial absorbance ( $\Delta A$ ) for Eu•L (line 1) and Gd•L (line 2) in CH<sub>3</sub>CN.
